# Supplementary material for: Genome-Wide Quantitative Analysis of Histone H3 Lysine 4 Trimethylation in Wild House Mouse Liver: Environmental Change Causes Epigenetic Plasticity
Source: PLOS journal article supplement (doi:10.1371/journal.pone.0097568), 2014-05-21

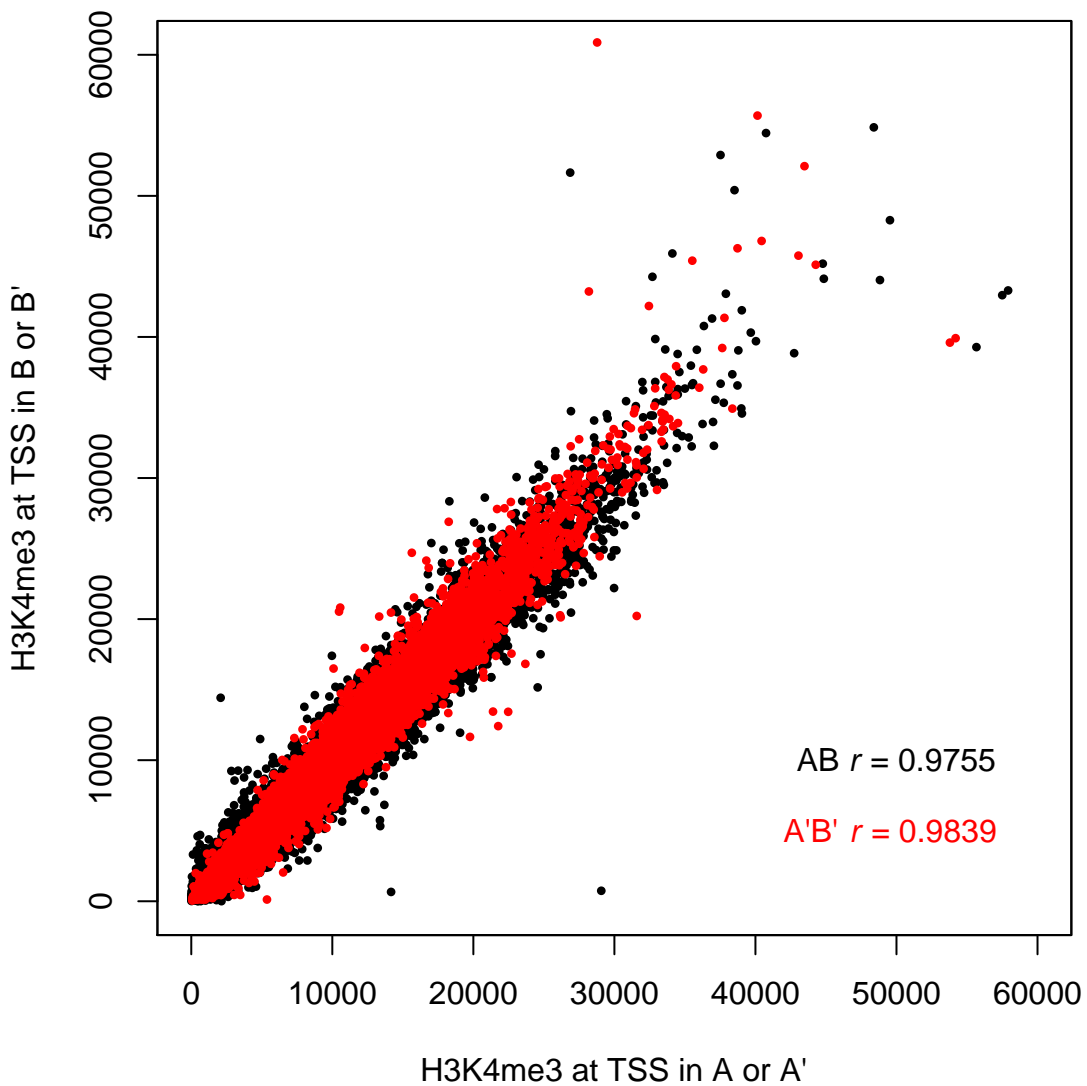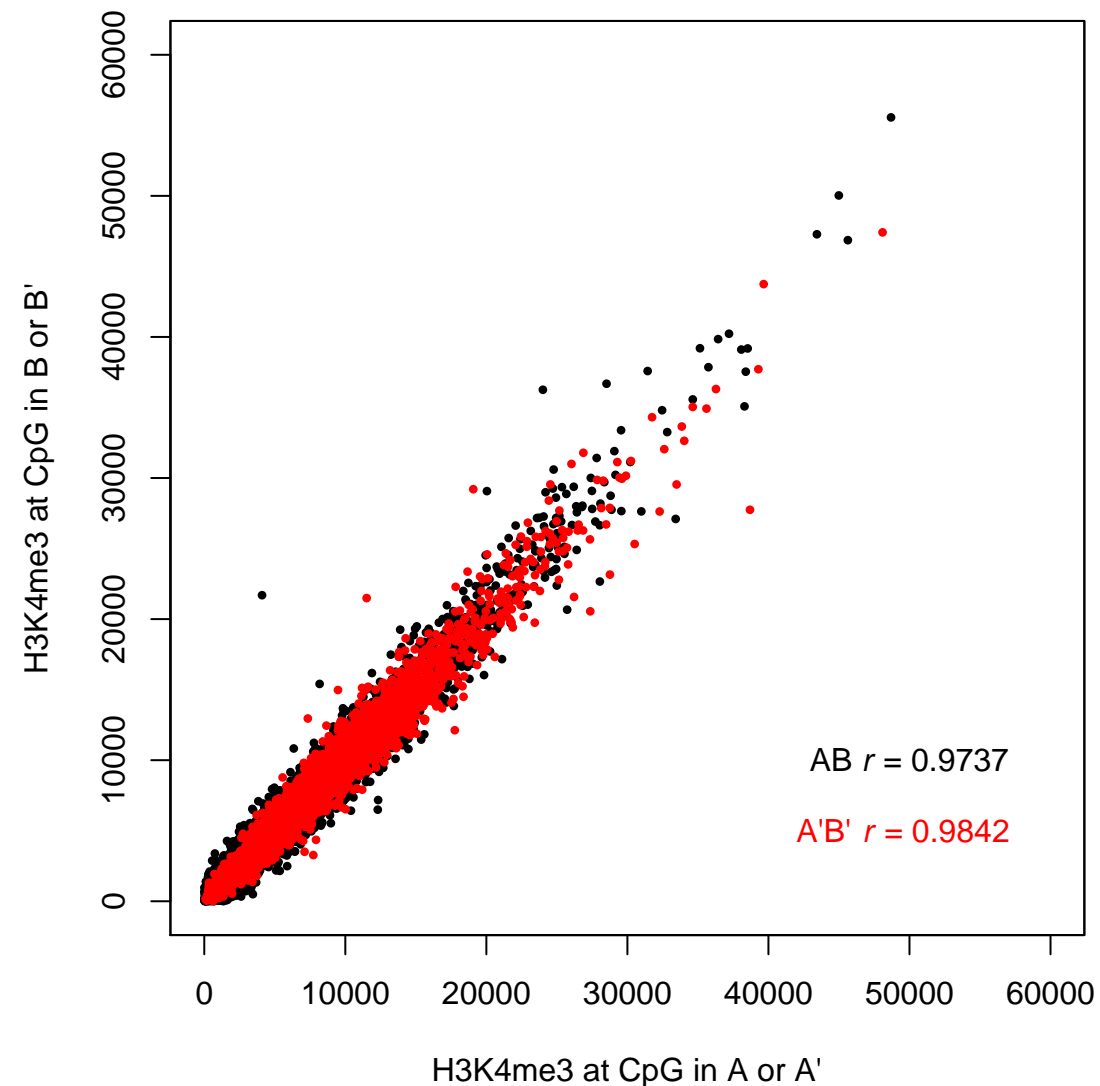

Supplement: S5 (10.1371/journal.pone.0097568.s005) [file journal.pone.0097568.s005]
