# Supplementary material for: Genome-Wide Quantitative Analysis of Histone H3 Lysine 4 Trimethylation in Wild House Mouse Liver: Environmental Change Causes Epigenetic Plasticity
Source: PLOS journal article supplement (doi:10.1371/journal.pone.0097568), 2014-05-21
Supplement: S11 (10.1371/journal.pone.0097568.s011) [file journal.pone.0097568.s011]

**Table S1.** Sequencing, mapping, and normalization factors for the experimental populations A and B and the respective offspring populations A' and B'

|                              | <b>A</b>   | <b>B</b>   | <b>A'</b>  | <b>B'</b>  |
|------------------------------|------------|------------|------------|------------|
| <b>sequence reads</b>        | 44,860,778 | 45,748,016 | 39,701,327 | 38,515,061 |
| <b>uniquely mapped reads</b> | 27,210,806 | 27,901,537 | 28,562,044 | 28,479,574 |
|                              | (60.66%)   | (58.80%)   | (71.94%)   | (73.94%)   |
| <b>unalignable reads</b>     | 9,580,791  | 10,096,077 | 3,882,210  | 2,710,235  |
|                              | (21.37%)   | (22.07%)   | (9.78%)    | (7.04%)    |
| <b>reads suppressed by</b>   | 8,069,181  | 8,750,412  | 7,257,073  | 7,325,252  |
| <b>uniqueness command</b>    | (17.99%)   | (19.13%)   | (18.28%)   | (19.02%)   |
| <b>normalization factor</b>  | 1          | 1.012      | 0.655      | 0.907      |
| <b>"housekeeping genes"</b>  |            |            |            |            |
